# Supplementary material for: Allosteric effects in a tetrapodal imidazolium-derived calix[4]arene anion receptor
Source: Royal Society of Chemistry journal article supplement (doi:10.1039/b904148f), 2009-01-01
Supplement: b904148f.pdf [file b904148f.pdf]

## Allosteric Effects in a Tetrapodal Imidazolium-Derived Calix[4]arene Anion Receptor<sup>†</sup>

Charlotte E. Willans,<sup>a</sup> Kirsty M. Anderson<sup>b</sup> and Jonathan W. Steed<sup>b\*</sup>

a) *School of Chemistry, University of Leeds, Leeds LS2 9JT, UK*

b) *Department of Chemistry, Durham University, South Road, Durham DH1 3LE, UK. jon.steed@durham.ac.uk*

### Supplementary Material

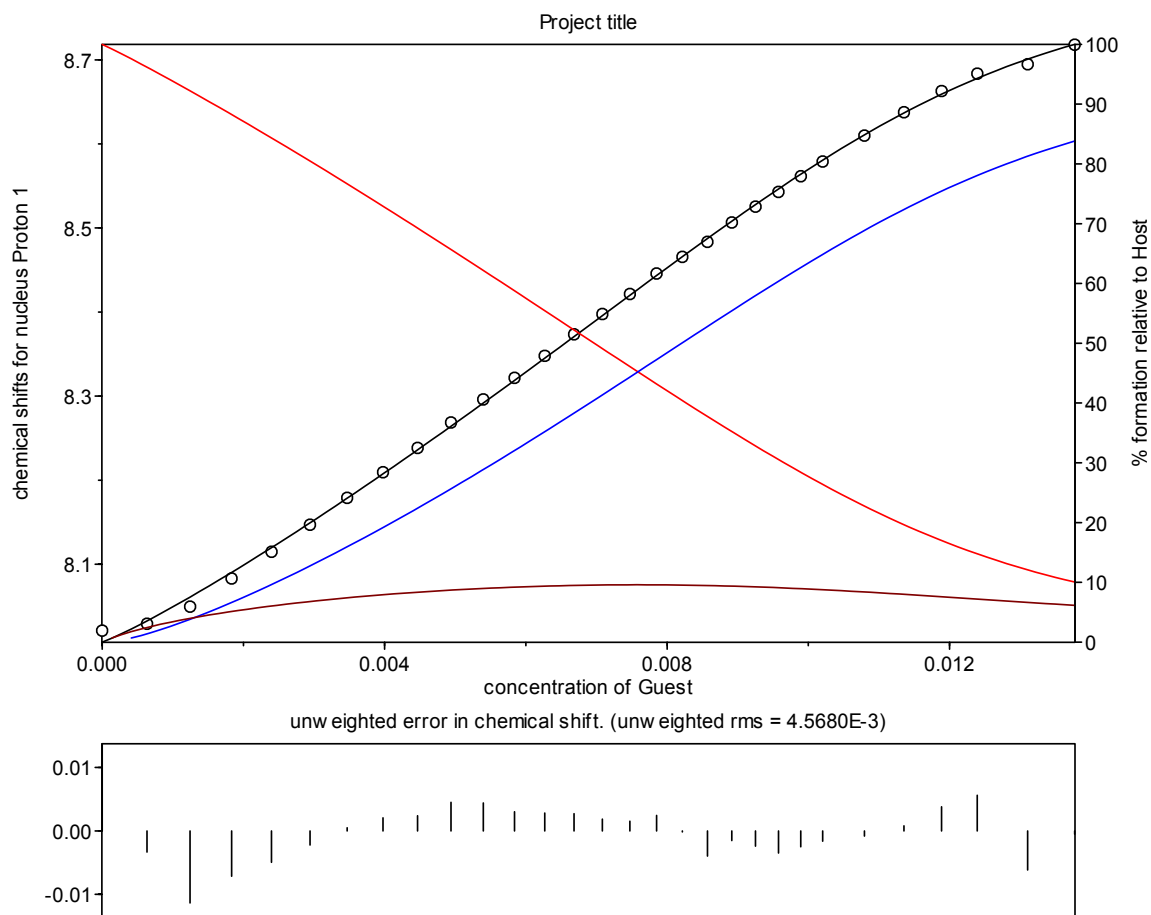

Figure S1: HYPNMR fitting data for Cl<sup>-</sup> binding by **3**

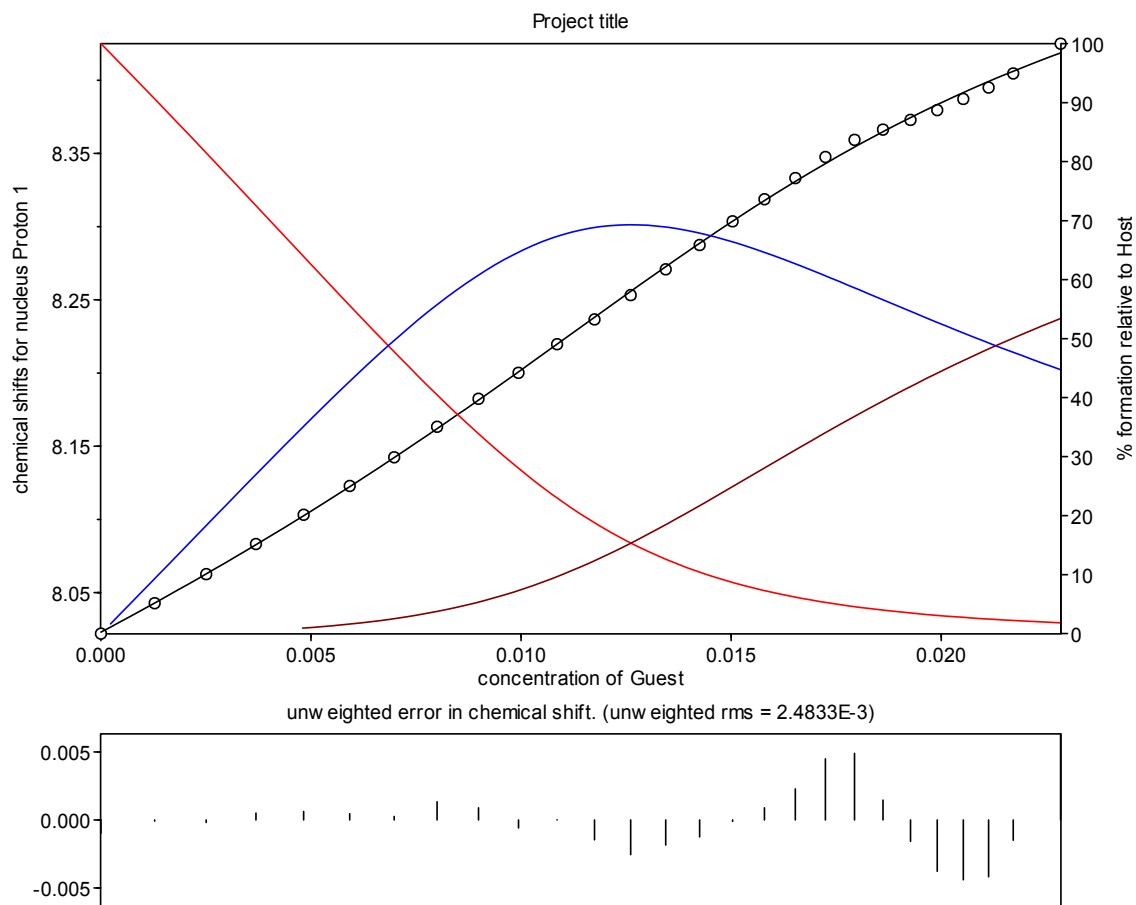

Figure S2: HYPNMR fitting data for Br<sup>-</sup> binding by **3**

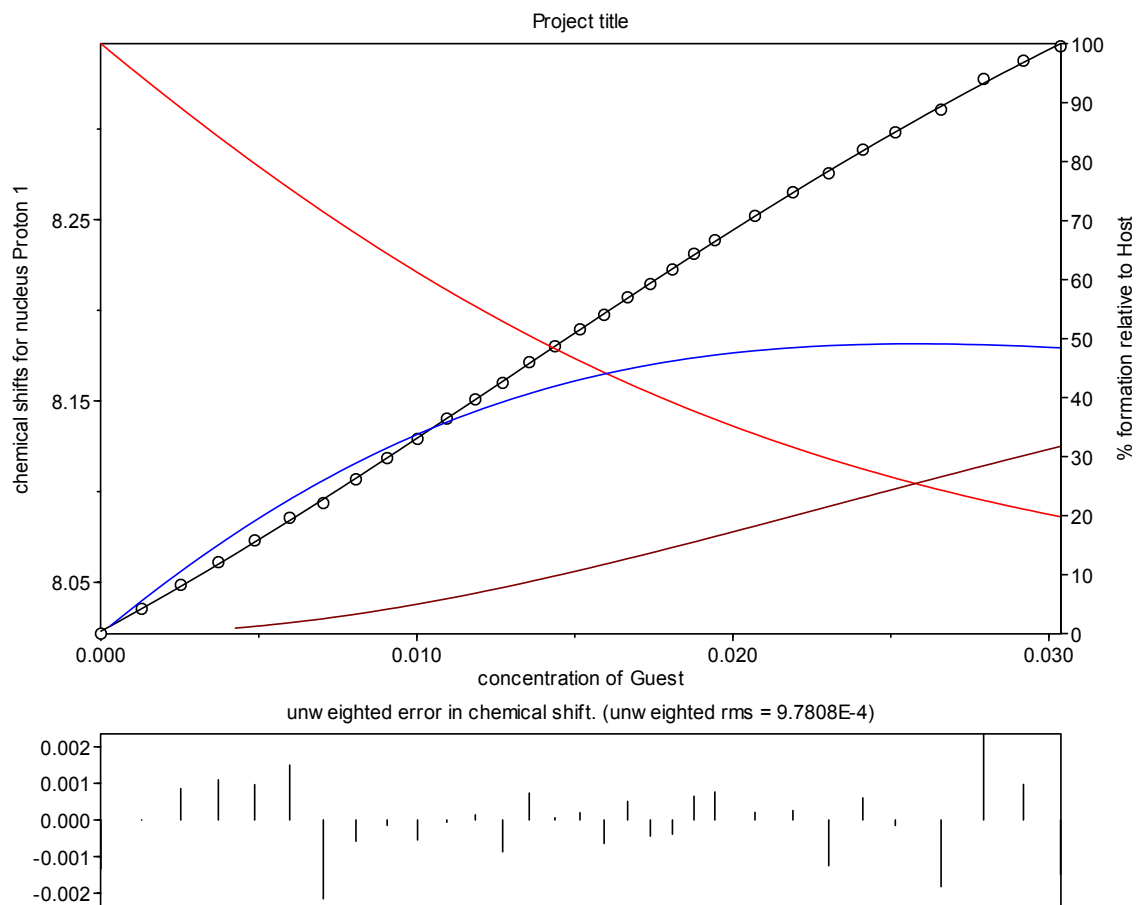

Figure S3: HYPNMR fitting data for  $\text{NO}_3^-$  binding by **3**

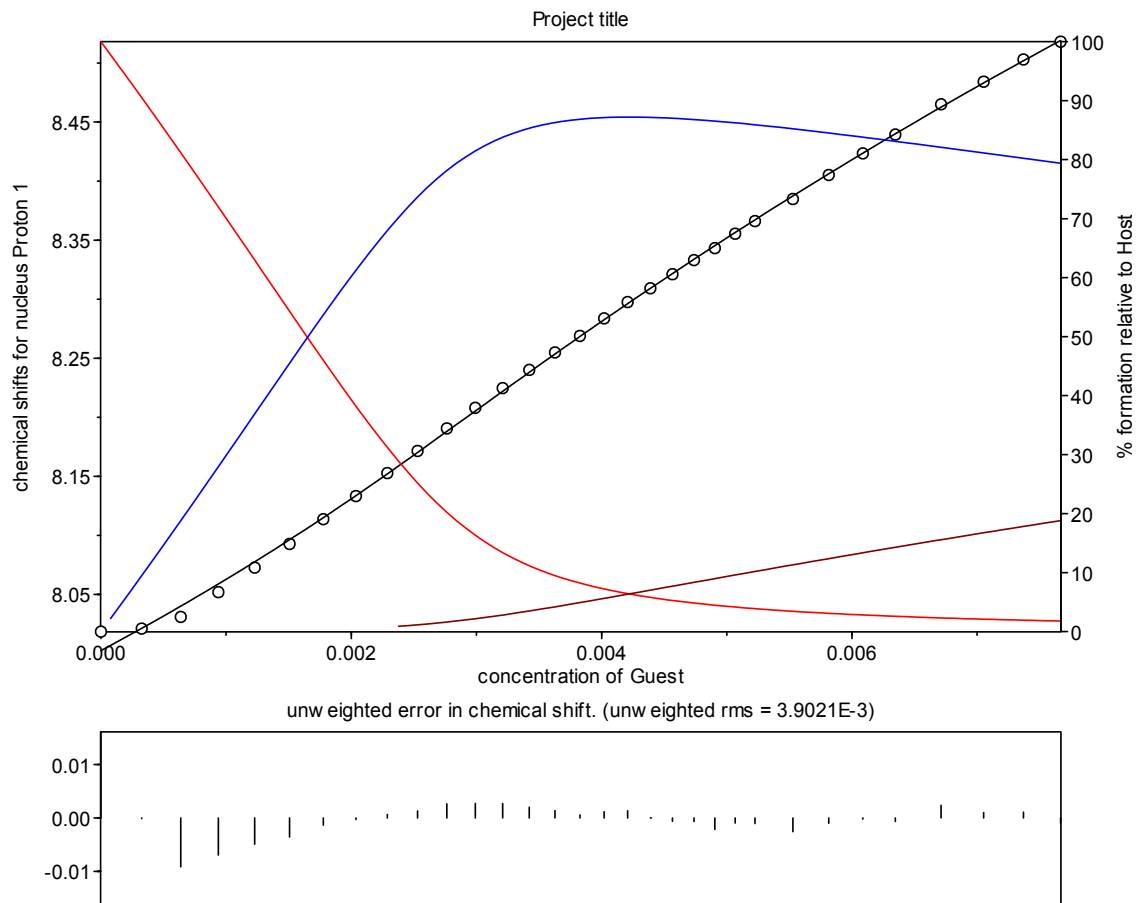

Figure S4: HYPNMR fitting data for  $\text{MeCO}_2^-$  binding by **3**

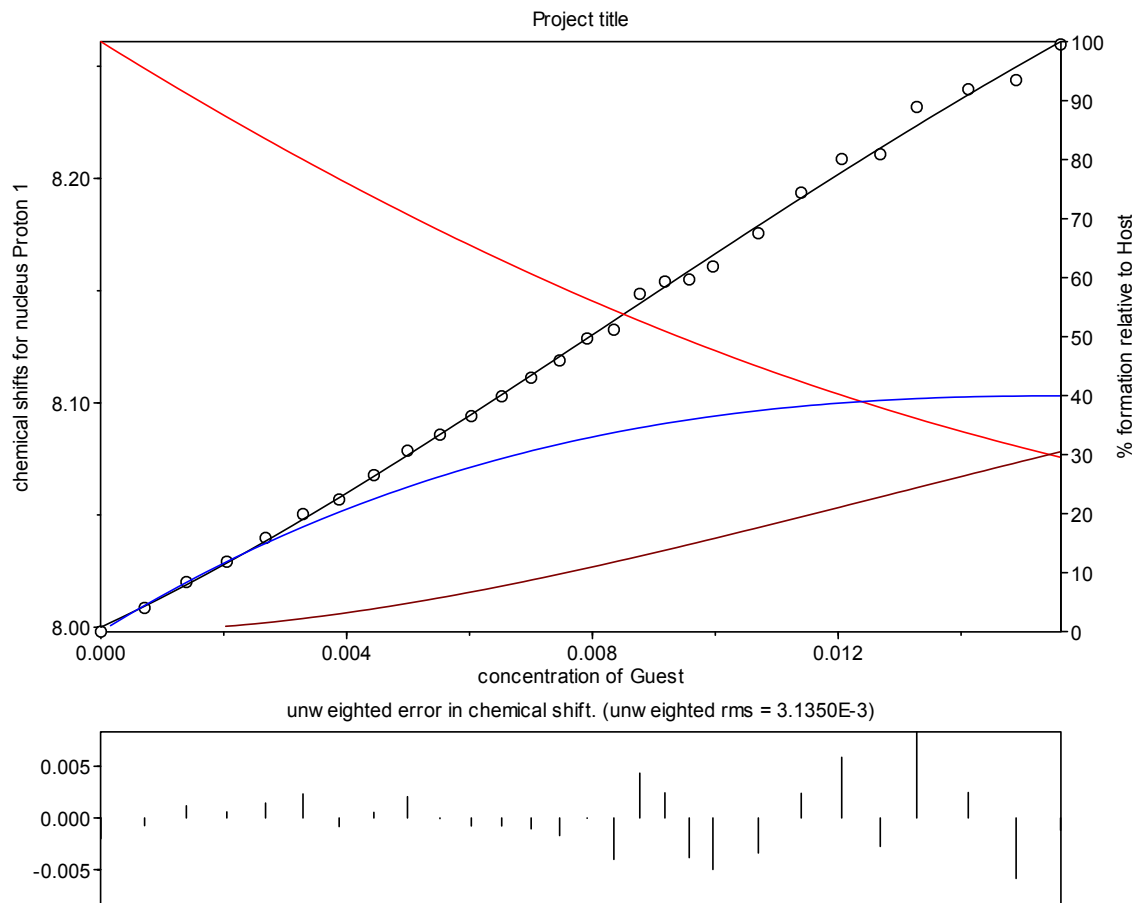

Figure S5: HYPNMR fitting data for malonate<sup>2-</sup> binding by **3**
